# Supplementary material for: Proactive One-Health surveillance reveals novel orthobunyaviruses and their potential vectors and reservoirs
Source: Research Square preprint supplement (doi:10.21203/rs.3.rs-5883685/v1), 2025-03-07
Supplement: Supplementary file 1 [file fc621f717e4259d2935346c0.xlsx]

## Sheet: Sheet1
	Pairwise amino acids distance of the RNA-dependet RNA polymerase
		Sample_1_L	Sample_3b_L	Sample_2a_L	Sample_4b_L	Sample_6b_L	Sample_8_L	Sample_10_L	Sample_11_L	Sample_9_L	Sample_1_1_final	Sample_2_1_final	KF254779_Madrid_BT4075	MK896441_Vinces_L	KF254790_Orthobunyavirus_FSL2923	KM092512_Itaya_IQT9646	KF254787_Caraparu_IQD5973	KF254793_Caraparu_FMD0783	KF254784_Caraparu_FVB0426	KF254776_Caraparu_BeAn3994	Itaqui_BeAn12797	KM280929_Bruconha_77V74814	KF254773_Oriboca_BeAn17	KM280931_Murutucu_BeAn_974	KM280932_Restan_TRVL_51144	JN157805_Marituba_IQE7620	Apeu_BeAn848	KF254770_Marituba_BeAn15	KM280933_Nepuyo_TRVL_18462	Nepuyo_BeAn10709	KM280930_Gumbo_Limbo_Fe371H2	Sample_5_L	Sample_7_L	Sample_4a_L	Sample_6a_L	KP835520_Mahogany_hammock	KP792675_Moju	KP792657_Bimiti	KP792666_Guama	KP792660_Catu	KY013484_Ananindeua	KP792663_Guajara	KU178980_Capim	Sample_2b_L	Sample_3a_L	KY013487_Mirim	KU178983_Enseada	KX161718_Bellavista	KM972719_Tete
	Sample_1_L
	Sample_3b_L	1
	Sample_2a_L	1	1
	Sample_4b_L	0.997	0.997	0.997
	Sample_6b_L	0.997	0.997	0.997	1
	Sample_8_L	0.997	0.997	0.997	0.995	0.995
	Sample_10_L	0.997	0.997	0.997	0.995	0.995	1
	Sample_11_L	0.997	0.997	0.997	0.995	0.995	1	1
	Sample_9_L	0.997	0.997	0.997	0.995	0.995	1	1	1
	Sample_1_1_final	0.997	0.997	0.997	0.995	0.995	0.998	0.998	0.998	0.998
	Sample_2_1_final	0.994	0.994	0.994	0.992	0.992	0.994	0.994	0.994	0.994	0.994
	KF254779_Madrid_BT4075	0.985	0.985	0.985	0.984	0.984	0.983	0.983	0.983	0.983	0.983	0.982
	MK896441_Vinces_L	0.964	0.964	0.964	0.963	0.963	0.965	0.965	0.965	0.965	0.965	0.964	0.964
	KF254790_Orthobunyavirus_FSL2923	0.944	0.944	0.944	0.943	0.943	0.945	0.945	0.945	0.945	0.945	0.944	0.942	0.943
	KM092512_Itaya_IQT9646	0.944	0.944	0.944	0.943	0.943	0.945	0.945	0.945	0.945	0.946	0.945	0.942	0.943	0.997
	KF254787_Caraparu_IQD5973	0.944	0.944	0.944	0.943	0.943	0.946	0.946	0.946	0.946	0.946	0.945	0.942	0.942	0.993	0.994
	KF254793_Caraparu_FMD0783	0.945	0.945	0.945	0.944	0.944	0.946	0.946	0.946	0.946	0.946	0.947	0.944	0.943	0.987	0.986	0.984
	KF254784_Caraparu_FVB0426	0.944	0.944	0.944	0.943	0.943	0.944	0.944	0.944	0.944	0.945	0.945	0.942	0.94	0.979	0.979	0.977	0.981
	KF254776_Caraparu_BeAn3994	0.943	0.943	0.943	0.942	0.942	0.943	0.943	0.943	0.943	0.944	0.943	0.939	0.942	0.973	0.973	0.972	0.974	0.971
	Itaqui_BeAn12797	0.897	0.897	0.897	0.896	0.896	0.897	0.897	0.897	0.897	0.897	0.897	0.893	0.894	0.924	0.924	0.924	0.926	0.924	0.944
	KM280929_Bruconha_77V74814	0.891	0.891	0.891	0.889	0.889	0.891	0.891	0.891	0.891	0.891	0.891	0.89	0.889	0.895	0.894	0.895	0.893	0.894	0.892	0.852
	KF254773_Oriboca_BeAn17	0.798	0.798	0.798	0.798	0.798	0.798	0.798	0.798	0.798	0.798	0.797	0.793	0.799	0.798	0.798	0.798	0.801	0.798	0.8	0.764	0.797
	KM280931_Murutucu_BeAn_974	0.798	0.798	0.798	0.798	0.798	0.797	0.797	0.797	0.797	0.797	0.796	0.793	0.8	0.799	0.799	0.798	0.801	0.798	0.799	0.764	0.797	0.995
	KM280932_Restan_TRVL_51144	0.798	0.798	0.798	0.798	0.798	0.797	0.797	0.797	0.797	0.797	0.796	0.793	0.798	0.8	0.8	0.799	0.801	0.798	0.798	0.762	0.796	0.971	0.972
	JN157805_Marituba_IQE7620	0.796	0.796	0.796	0.796	0.796	0.796	0.796	0.796	0.796	0.796	0.793	0.792	0.799	0.798	0.798	0.798	0.797	0.796	0.799	0.764	0.795	0.928	0.929	0.924
	Apeu_BeAn848	0.798	0.798	0.798	0.798	0.798	0.798	0.798	0.798	0.798	0.798	0.798	0.794	0.795	0.795	0.796	0.796	0.797	0.796	0.797	0.76	0.798	0.913	0.913	0.913	0.924
	KF254770_Marituba_BeAn15	0.794	0.794	0.794	0.794	0.794	0.795	0.795	0.795	0.795	0.795	0.794	0.789	0.797	0.793	0.794	0.794	0.794	0.794	0.795	0.761	0.794	0.912	0.911	0.912	0.927	0.947
	KM280933_Nepuyo_TRVL_18462	0.767	0.767	0.767	0.766	0.766	0.767	0.767	0.767	0.767	0.767	0.765	0.768	0.769	0.771	0.771	0.772	0.769	0.765	0.769	0.735	0.77	0.789	0.789	0.786	0.794	0.791	0.791
	Nepuyo_BeAn10709	0.773	0.773	0.773	0.772	0.772	0.774	0.774	0.774	0.774	0.774	0.771	0.774	0.777	0.776	0.776	0.778	0.775	0.773	0.773	0.739	0.772	0.79	0.791	0.791	0.797	0.795	0.794	0.951
	KM280930_Gumbo_Limbo_Fe371H2	0.759	0.759	0.759	0.757	0.757	0.759	0.759	0.759	0.759	0.759	0.759	0.759	0.759	0.76	0.761	0.761	0.762	0.764	0.764	0.731	0.762	0.784	0.783	0.783	0.791	0.792	0.787	0.891	0.892
	Sample_5_L	0.706	0.706	0.706	0.706	0.706	0.707	0.707	0.707	0.707	0.707	0.706	0.705	0.703	0.708	0.708	0.711	0.709	0.709	0.708	0.679	0.707	0.696	0.695	0.699	0.685	0.693	0.688	0.685	0.689	0.683
	Sample_7_L	0.706	0.706	0.706	0.706	0.706	0.707	0.707	0.707	0.707	0.707	0.706	0.705	0.703	0.708	0.708	0.711	0.709	0.709	0.708	0.679	0.707	0.696	0.695	0.699	0.685	0.693	0.688	0.685	0.689	0.683	1
	Sample_4a_L	0.706	0.706	0.706	0.706	0.706	0.707	0.707	0.707	0.707	0.707	0.706	0.705	0.703	0.708	0.708	0.711	0.709	0.709	0.708	0.679	0.707	0.696	0.695	0.699	0.685	0.693	0.688	0.685	0.689	0.683	1	1
	Sample_6a_L	0.706	0.706	0.706	0.706	0.706	0.707	0.707	0.707	0.707	0.707	0.706	0.705	0.703	0.708	0.708	0.711	0.709	0.709	0.708	0.679	0.707	0.696	0.695	0.699	0.685	0.693	0.688	0.685	0.689	0.683	1	1	1
	KP835520_Mahogany_hammock	0.712	0.712	0.712	0.71	0.71	0.712	0.712	0.712	0.712	0.712	0.711	0.711	0.709	0.708	0.709	0.71	0.709	0.708	0.711	0.683	0.708	0.702	0.701	0.703	0.693	0.7	0.694	0.69	0.693	0.692	0.921	0.921	0.921	0.921
	KP792675_Moju	0.703	0.703	0.703	0.704	0.704	0.704	0.704	0.704	0.704	0.704	0.703	0.702	0.703	0.7	0.701	0.702	0.703	0.702	0.704	0.677	0.704	0.701	0.7	0.701	0.696	0.7	0.693	0.69	0.687	0.688	0.896	0.896	0.896	0.896	0.887
	KP792657_Bimiti	0.704	0.704	0.704	0.703	0.703	0.704	0.704	0.704	0.704	0.704	0.704	0.701	0.704	0.702	0.703	0.704	0.704	0.702	0.705	0.677	0.701	0.7	0.699	0.701	0.696	0.698	0.696	0.685	0.687	0.688	0.897	0.897	0.897	0.897	0.886	0.949
	KP792666_Guama	0.704	0.704	0.704	0.704	0.704	0.704	0.704	0.704	0.704	0.704	0.703	0.702	0.705	0.703	0.702	0.704	0.704	0.701	0.707	0.678	0.703	0.703	0.702	0.703	0.699	0.7	0.699	0.689	0.692	0.689	0.896	0.896	0.896	0.896	0.884	0.948	0.98
	KP792660_Catu	0.704	0.704	0.704	0.704	0.704	0.705	0.705	0.705	0.705	0.705	0.704	0.703	0.706	0.706	0.707	0.708	0.707	0.705	0.709	0.68	0.704	0.7	0.699	0.701	0.695	0.702	0.696	0.689	0.692	0.691	0.896	0.896	0.896	0.896	0.887	0.962	0.958	0.957
	KY013484_Ananindeua	0.695	0.695	0.695	0.695	0.695	0.696	0.696	0.696	0.696	0.696	0.694	0.695	0.693	0.694	0.693	0.695	0.696	0.694	0.695	0.667	0.689	0.693	0.692	0.692	0.682	0.684	0.682	0.684	0.685	0.684	0.865	0.865	0.865	0.865	0.858	0.876	0.876	0.874	0.88
	KP792663_Guajara	0.692	0.692	0.692	0.692	0.692	0.692	0.692	0.692	0.692	0.693	0.692	0.691	0.692	0.691	0.69	0.691	0.692	0.692	0.696	0.668	0.69	0.686	0.685	0.688	0.681	0.686	0.684	0.671	0.673	0.675	0.789	0.789	0.789	0.789	0.792	0.792	0.789	0.792	0.798	0.774
	KU178980_Capim	0.691	0.691	0.691	0.691	0.691	0.691	0.691	0.691	0.691	0.692	0.692	0.69	0.69	0.69	0.691	0.692	0.691	0.689	0.694	0.666	0.692	0.691	0.691	0.691	0.685	0.688	0.683	0.675	0.681	0.677	0.794	0.794	0.794	0.794	0.79	0.787	0.787	0.791	0.793	0.783	0.874
	Sample_2b_L	0.686	0.686	0.686	0.686	0.686	0.686	0.686	0.686	0.686	0.687	0.687	0.687	0.684	0.687	0.687	0.687	0.687	0.688	0.689	0.662	0.682	0.677	0.677	0.68	0.675	0.681	0.679	0.675	0.679	0.674	0.786	0.786	0.786	0.786	0.778	0.774	0.774	0.779	0.778	0.771	0.844	0.842
	Sample_3a_L	0.686	0.686	0.686	0.686	0.686	0.686	0.686	0.686	0.686	0.687	0.687	0.687	0.684	0.687	0.687	0.687	0.687	0.688	0.689	0.662	0.682	0.677	0.677	0.68	0.675	0.681	0.679	0.675	0.679	0.674	0.785	0.785	0.785	0.785	0.777	0.774	0.774	0.779	0.778	0.771	0.843	0.842	0.999
	KY013487_Mirim	0.695	0.695	0.695	0.694	0.694	0.696	0.696	0.696	0.696	0.696	0.696	0.696	0.697	0.697	0.696	0.697	0.698	0.698	0.704	0.679	0.701	0.691	0.69	0.694	0.69	0.69	0.69	0.69	0.689	0.688	0.743	0.743	0.743	0.743	0.752	0.743	0.74	0.739	0.741	0.736	0.73	0.73	0.731	0.731
	KU178983_Enseada	0.693	0.693	0.693	0.692	0.692	0.693	0.693	0.693	0.693	0.694	0.691	0.693	0.693	0.695	0.695	0.696	0.697	0.694	0.698	0.677	0.691	0.7	0.699	0.7	0.706	0.701	0.701	0.697	0.698	0.694	0.681	0.681	0.681	0.681	0.687	0.677	0.675	0.681	0.681	0.672	0.67	0.671	0.672	0.672	0.69
	KX161718_Bellavista	0.659	0.659	0.659	0.658	0.658	0.661	0.661	0.661	0.661	0.66	0.659	0.658	0.662	0.663	0.663	0.664	0.664	0.665	0.663	0.642	0.659	0.658	0.658	0.658	0.662	0.659	0.658	0.66	0.662	0.658	0.641	0.641	0.641	0.641	0.647	0.646	0.638	0.641	0.644	0.641	0.632	0.632	0.639	0.639	0.645	0.672
	KM972719_Tete	0.517	0.517	0.517	0.517	0.517	0.517	0.517	0.517	0.517	0.518	0.518	0.517	0.517	0.519	0.519	0.518	0.518	0.519	0.522	0.504	0.518	0.525	0.525	0.525	0.518	0.526	0.522	0.524	0.522	0.526	0.519	0.519	0.519	0.519	0.514	0.513	0.52	0.517	0.514	0.52	0.513	0.512	0.509	0.509	0.521	0.521	0.506
	KP792654_Bahig	0.521	0.521	0.521	0.52	0.52	0.52	0.52	0.52	0.52	0.521	0.52	0.522	0.519	0.52	0.52	0.518	0.519	0.518	0.52	0.502	0.519	0.528	0.528	0.526	0.523	0.524	0.526	0.525	0.521	0.524	0.511	0.511	0.511	0.511	0.507	0.51	0.516	0.515	0.513	0.517	0.508	0.51	0.51	0.51	0.522	0.518	0.511	0.829
	HM639780_Oyo	0.523	0.523	0.523	0.523	0.523	0.524	0.524	0.524	0.524	0.524	0.524	0.523	0.523	0.516	0.516	0.515	0.515	0.515	0.517	0.503	0.523	0.51	0.51	0.513	0.506	0.505	0.504	0.517	0.514	0.518	0.51	0.51	0.51	0.51	0.512	0.504	0.506	0.506	0.505	0.507	0.505	0.504	0.503	0.503	0.517	0.511	0.503	0.573
[truncated: 2 more columns]
